# Supplementary material for: The N-terminus of Paenibacillus larvae C3larvinA modulates catalytic efficiency
Source: PubMed Central journal article supplement (PMC7789906; doi:10.1042/bsr20203727), 2021-01-06

**B.**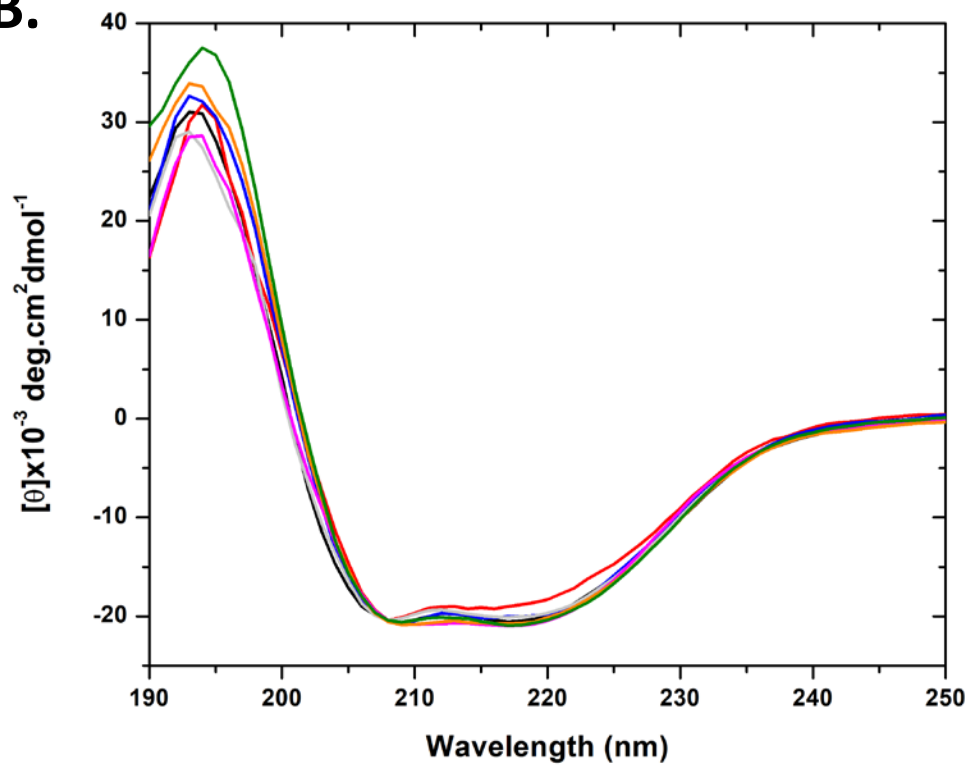**C.**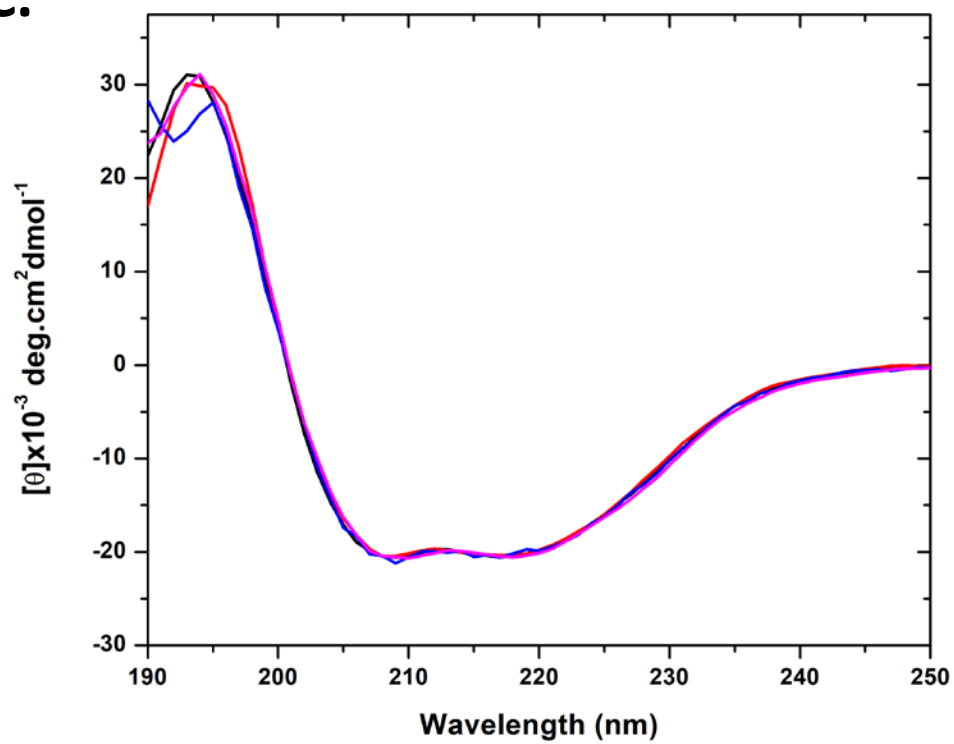

Supplement: BSR-2020-3727_supp.pdf [file BSR-2020-3727_supp.pdf]
